# Supplementary material for: Genotoxicity and Gene Expression in the Rat Lung Tissue following Instillation and Inhalation of Different Variants of Amorphous Silica Nanomaterials (aSiO2 NM)
Source: MDPI journal article supplement (doi:10.3390/nano11061502), 2021-06-07
Supplement: s1 [file s1]

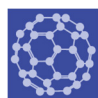

# Genotoxicity and Gene Expression in the Rat Lung Tissue Following Instillation and Inhalation of Different Variants of Amorphous Silica Nanomaterials (aSiO<sub>2</sub> NM)

Fátima Brandão <sup>1,2,3,4</sup>, Carla Costa <sup>1,2,3</sup>, Maria João Bessa <sup>1,2,3,4</sup>, Elise Dumortier <sup>5</sup>, Florence Debacq-Chainiaux <sup>5</sup>, Roland Hubaux <sup>6</sup>, Michel Salmon <sup>6</sup>, Julie Laloy <sup>7</sup>, Miruna S. Stan <sup>8</sup>, Anca Hermenean <sup>8,9</sup>, Sami Gharbia <sup>8,9</sup>, Anca Dinischiotu <sup>8</sup>, Anne Bannuscher <sup>10,11</sup>, Bryan Hellack <sup>12,13</sup>, Andrea Haase <sup>10</sup>, Sónia Fraga <sup>1,2,3,\*</sup> and João Paulo Teixeira <sup>1,2,3</sup>

- <sup>1</sup> EPIUnit—Instituto de Saúde Pública, Universidade do Porto, Rua das Taipas, 4050-600 Porto, Portugal; fatimabrandao.988@gmail.com (F.B.); cstcosta@gmail.com (C.C.); mjbessa8@gmail.com (M.J.B.); jpft12@gmail.com (J.P.T.)
- <sup>2</sup> Laboratory for Integrative and Translational Research in Population Health (ITR), 4050-600 Porto, Portugal
- <sup>3</sup> Environmental Health Department, National Institute of Health Dr. Ricardo Jorge, Rua Alexandre Herculano 321, 4000-053 Porto, Portugal
- <sup>4</sup> ICBAS—Institute of Biomedical Sciences Abel Salazar, U. Porto—University of Porto, Rua de Jorge Viterbo Ferreira 228, 4050-313 Porto, Portugal
- <sup>5</sup> Unité de Recherche en Biologie Cellulaire (URBC), Namur Research Institute for Life Sciences (Narilis), University of Namur, 5000 Namur, Belgium; elise.dumortier@gmail.com (E.D.); florence.chainiaux@unamur.be (F.D.-C.)
- <sup>6</sup> StratiCELL Laboratories, Research and Development, 5032 Les Isnes, Belgium; rhubaux@straticell.com (R.H.); msalmon@straticell.com (M.S.)
- <sup>7</sup> Department of Pharmacy, Namur Nanosafety Centre, Namur Research Institute for Life Sciences (Narilis), University of Namur, 5000 Namur, Belgium; julie.laloy@unamur.be (J.L.)
- <sup>8</sup> Department of Biochemistry and Molecular Biology, University of Bucharest, 050095 Bucharest, Romania; miruna.stan@bio.unibuc.ro (M.S.S.); anca.hermenean@gmail.com (A.H.); samithgh2@hotmail.com (S.G.); anca.dinischiotu@bio.unibuc.ro (A.D.)
- <sup>9</sup> “Aurel Ardelean” Institute of Life Sciences, “Vasile Goldis” Western University of Arad, 310414 Arad, Romania
- <sup>10</sup> Department of Chemicals and Product Safety, German Federal Institute for Risk Assessment (BfR), 10589 Berlin, Germany; anne.bannuscher@unifr.ch (A.B.); Andrea.Haase@bfr.bund.de (A.H.)
- <sup>11</sup> Adolphe Merkle Institute (AMI), University of Fribourg, 1700 Fribourg, Switzerland
- <sup>12</sup> Institute of Energy and Environmental Technology (IUTA) e.V., 47229 Duisburg, Germany; bryan.hellack@uba.de
- <sup>13</sup> German Environment Agency (UBA), 06844 Dessau-Roßlau, Germany
- \* Correspondence: sonia.fraga@insa.min-saude.pt; Tel.: +351-223-401143

**Table S1.** Main physicochemical properties of the tested aSiO<sub>2</sub> and TiO<sub>2</sub> nanomaterials in deionized water [1].

| NM property                      | SiO <sub>2</sub> _7 | SiO <sub>2</sub> _15_ Unmod | SiO <sub>2</sub> _15_ Amino | SiO <sub>2</sub> _40 | TiO <sub>2</sub> _ NM-105 |
|----------------------------------|---------------------|-----------------------------|-----------------------------|----------------------|---------------------------|
| Primary particle size (nm)       | 8 <sup>a</sup>      | 15 <sup>a</sup>             | 15 <sup>a</sup>             | 40 <sup>a</sup>      | 21 <sup>a</sup>           |
| Surface area (m <sup>2</sup> /g) | 249                 | 200 <sup>a</sup>            | 200 <sup>a</sup>            | 34                   | 57                        |
| Hydrodynamic diameter (nm)       | 243                 | 48                          | 47                          | 373                  | 394                       |
| Zeta potential pH 7.4 (mV)       | −39.8               | −36.7                       | −36.4                       | −40.9                | −25.1                     |
| Dissolution rate (% w)           | 0.5                 | 0.5                         | 3.7                         | 0.11                 | 0.01                      |
| Redox potential (mV)             | 258                 | 254                         | 216                         | 260                  | 352                       |
| EPR CPH (mass-based)             | 0.93                | 0.82                        | 0.92                        | 0.68                 | 0.69                      |
| EPR CPH (surface-based)          | 0.004               | 0.004                       | 0.005                       | 0.02                 | 0.012                     |
| EPR DMPO (mass-based)            | 0.85                | 0.57                        | 0.97                        | 0.98                 | 1.01                      |
| EPR DMPO (surface-based)         | 0.003               | 0.003                       | 0.005                       | 0.029                | 0.018                     |

Primary particle size as provided by the manufacturer<sup>(a)</sup>; surface area as determined by Brunauer-Emmett-Teller (BET) and provided by the manufacturer; hydrodynamic diameter as determined by Dynamic Light Scattering (DLS); zeta potential as determined by Electrophoretic Light Scattering (ELS); dissolution rate in a steady-state system after 24 h shaking as determined by Inductively Coupled Plasma Optical Emission Spectrometry ICP-OES; redox potential measured using a potentiometer with platinum (Pt) electrode. Electron paramagnetic resonance (EPR) measurements using the spin probe CPH (EPR CPH) or DMPO (EPR CPH) were conducted - NM were applied at the same mass dose (mass-based) or at the same surface area dose (surface-based) and results were expressed in a sample to blank ratio.

**Table S2.** Custom TaqMan Array Card (TAC) genes list.

| Gene symbol     | NM           | Name                                                                             |
|-----------------|--------------|----------------------------------------------------------------------------------|
| <i>18s</i>      | NR_046237    | RNA, 18s ribosomal                                                               |
| <i>Actb</i>     | NM_031144    | Actin beta                                                                       |
| <i>Gapdh</i>    | NM_017008    | Glyceraldehyde-3-phosphate dehydrogenase                                         |
| <i>Ppia</i>     | NM_017101    | Peptidylprolyl isomerase A (cyclophilin A)                                       |
| <i>A2m</i>      | NM_012488    | Alpha 2 macroglobulin                                                            |
| <i>Adrb2</i>    | NM_012492    | Adrenergic receptor, beta 2                                                      |
| <i>Anxa3</i>    | NM_012823    | Annexin A3                                                                       |
| <i>Bdkrb1</i>   | NM_030851    | Bradykinin receptor B1                                                           |
| <i>Casp1</i>    | NM_012762    | Caspase 1                                                                        |
| <i>Casp3</i>    | NM_012922    | Caspase 3                                                                        |
| <i>CD40</i>     | NM_134360    | CD40                                                                             |
| <i>CD 40 lg</i> | NM_053353    | CD 40 ligand                                                                     |
| <i>CXCL1</i>    | NM_030845    | C-X-C motif chemokine ligand 1                                                   |
| <i>GSTA1</i>    | NM_031509    | Glutathione S-transferase A1                                                     |
| <i>HMOX-1</i>   | NM_012580    | Heme Oxygenase-1                                                                 |
| <i>Hrh1</i>     | NM_017018    | Histamine receptor H1                                                            |
| <i>Hrh2</i>     | NM_012965    | Histamine receptor H2                                                            |
| <i>Icam1</i>    | NM_012967    | Intercellular adhesion molecule 1                                                |
| <i>IFN-g</i>    | NM_138880    | Interferon gamma                                                                 |
| <i>IL-1b</i>    | NM_031512    | Interleukin-1 beta                                                               |
| <i>Il1r1</i>    | NM_013123    | Interleukin 1 receptor type 1                                                    |
| <i>Il1rl1</i>   | NM_013037    | Interleukin 1 receptor like 1                                                    |
| <i>IL-6</i>     | NM_012589    | Interleukin-6                                                                    |
| <i>IL-10</i>    | NM_012854    | Interleukin-10                                                                   |
| <i>Itga1</i>    | NM_030994    | Integrin subunit alpha L                                                         |
| <i>Itgam</i>    | NM_012711    | Integrin subunit alpha M                                                         |
| <i>Itgb1</i>    | NM_017022    | Integrin subunit beta 1                                                          |
| <i>Itgb2</i>    | NM_001037780 | Integrin subunit beta 2                                                          |
| <i>Mapk3</i>    | NM_017347    | Mitogen-activated protein kinase 3                                               |
| <i>Mapk8</i>    | NM_053829    | Mitogen-activated protein kinase 8                                               |
| <i>Mapk14</i>   | NM_031020    | Mitogen-activated protein kinase 14                                              |
| <i>Nos2</i>     | NM_012611    | Nitric oxide synthase Inducible                                                  |
| <i>NQO1</i>     | NM_017000    | NAD(P)H dehydrogenase quinone 1                                                  |
| <i>OGG1</i>     | NM_030870    | 8-oxoguanine DNA glycosylase                                                     |
| <i>Pde4d</i>    | NM_001113328 | Phosphodiesterase 4B; cAMP specific                                              |
| <i>Pla2g7</i>   | NM_001009353 | Phospholipase A2; group VII (platelet-activating factor acetylhydrolase; plasma) |
| <i>Plcb2</i>    | NM_053478    | Phospholipase C; beta 2                                                          |
| <i>Plcb3</i>    | NM_033350    | Phospholipase C; beta 3                                                          |
| <i>Plcd1</i>    | NM_017035    | Phospholipase C delta 1                                                          |

---

|                 |              |                                            |
|-----------------|--------------|--------------------------------------------|
| <i>Ptgir</i>    | NM_001077644 | Prostaglandin I2 receptor                  |
| <i>Ptgis</i>    | NM_031557    | Prostaglandin I2 synthase                  |
| <i>Ptgs1</i>    | NM_017043    | Prostaglandin-endoperoxide synthase 1      |
| <i>Ptgs2</i>    | NM_017232    | Prostaglandin-endoperoxide synthase 2      |
| <i>RPLPO</i>    | NM_022402    | Ribosomal protein lateral stalk subunit P0 |
| <i>SOD2</i>     | NM_017051    | Superoxide Dismutase 2                     |
| <i>TNF</i>      | NM_012675    | Tumor Necrosis Factor-alpha                |
| <i>Tnfrsf1a</i> | NM_013091    | TNF receptor superfamily member 1A         |
| <i>Vcam1</i>    | NM_012889    | Vascular Cell Adhesion Protein 1           |

---

## Reference

1. Bahl, A.; Hellack, B.; Balas, M.; Dinischiotu, A.; Wiemann, M.; Brinkmann, J.; Luch, A.; Renard, B.Y.; Haase, A. Recursive feature elimination in random forest classification supports nanomaterial grouping. *NanoImpact* **2019**, *15*, 100179.
